# Supplementary material for: Excellent Response after Radioiodine Therapy of a Bone Metastasis of Skull from Follicular Thyroid Carcinoma, Fifteen Years after the First Treatment
Source: Preprints.org preprint supplement (doi:10.20944/preprints202312.1586.v1), 2023-12-21
Supplement: Supplementary file 1 [file supplementary]

**FIGURE LEGEND 1:** radioiodine up-taking area in the parietal bone (see the arrow)

**FIGURE LEGEND 2:** WBS 12 months after the RAIU with disappearance of the radioidine uptaking area in the parietal bone ( see the arrow).
