# Supplementary material for: Excellent Response after Radioiodine Therapy of a Bone Metastasis of Skull from Follicular Thyroid Carcinoma, Fifteen Years after the First Treatment
Source: Preprints.org preprint supplement (doi:10.20944/preprints202312.1586.v1), 2023-12-21
Supplement: Supplementary file 2 [file supplementary]

Archive with 3 entries (3 files):
- foto/figura 1.tiff
- foto/figura 2.tiff
- foto/FIGURE LEGEND 1.pdf
