# Supplementary figures and images for: Excellent Response after Radioiodine Therapy of a Bone Metastasis of Skull from Follicular Thyroid Carcinoma, Fifteen Years after the First Treatment
Source: Preprints.org preprint supplement (doi:10.20944/preprints202312.1586.v1), 2023-12-21

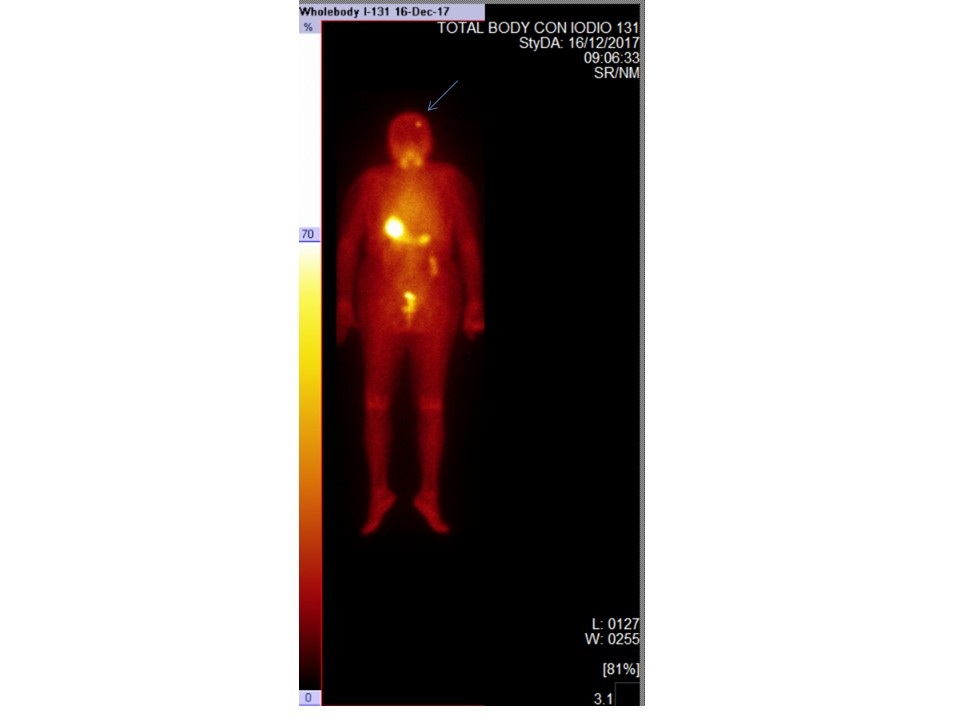

Supplement: Supplementary file 2 [file supplementary › foto/figura 1.tiff]

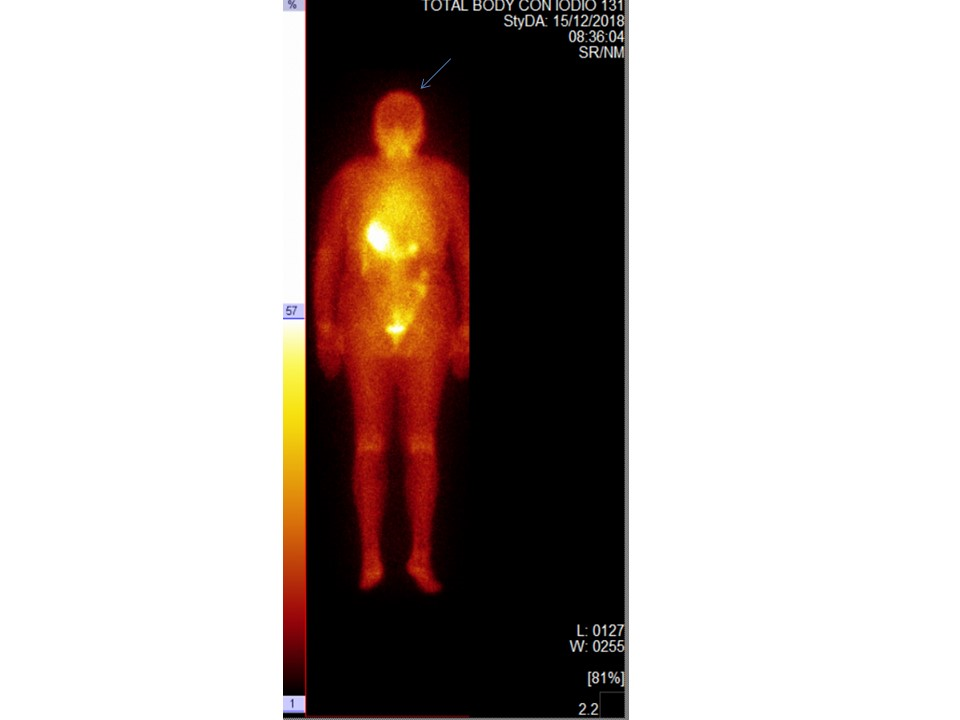

Supplement: Supplementary file 2 [file supplementary › foto/figura 2.tiff]
